# Supplementary material
Source: Springer Nature journal article supplement (https://www.springermedizin.de/resource/supplementary/13221_2012_44_MOESM2_ESM.pdf/9680838)

**A**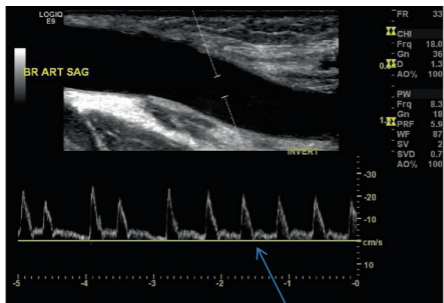**B**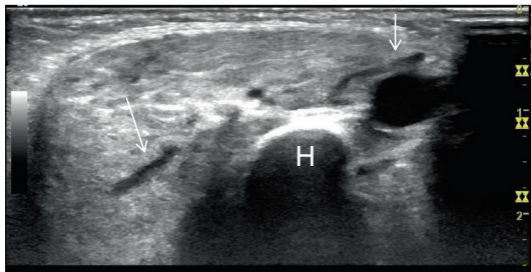**C**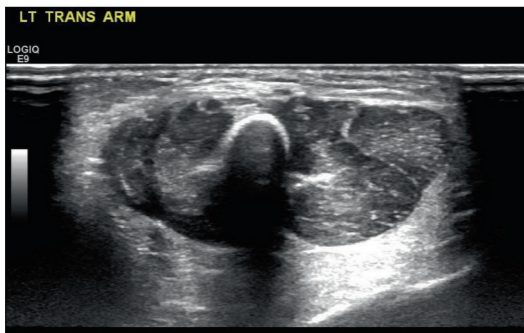

Supplement: MOESM2 [file 9680838]
